# Supplementary material for: Diabetes Management during the COVID-19 pandemic: A Study on Contributory Health Service Scheme Beneficiaries from Mumbai, India
Source: Research Square preprint supplement (doi:10.21203/rs.3.rs-6642930/v1), 2025-07-14
Supplement: Supplementary file 1 [file 57f8def96e7f93b29c8a8879.docx]

Supplementary Tables:

Table 1: Number of FPG and HbA1c Test Rates for Diabetes Patients per 1000 Patient Months during COVID and Non-COVID Periods

|  | ***Pre COVID*** | ***First cases*** | | ***First wave*** | | ***Intermittent period*** | | ***Second wave*** | |
| --- | --- | --- | --- | --- | --- | --- | --- | --- | --- |
| ***HbA1c Tests*** | ***Rate*** | ***Rate*** | ***Rate ratio*** | ***Rate*** | ***Rate ratio*** | ***Rate*** | ***Rate ratio*** | ***Rate*** | ***Rate ratio*** |
| ***Sex*** |  |  |  |  |  |  |  |  |  |
| *Men* | 95 | 57 | **0.60** | 53 | **0.56** | 47 | **0.50** | 58 | **0.62** |
| *Women* | 86 | 32 | **0.37** | 46 | **0.53** | 77 | 0.89 | 46 | **0.53** |
| ***Age group*** | |  |  |  |  |  |  |  |  |
| *30-44* | 102 | 22 | **0.22** | 60 | **0.59** | 70 | 0.69 | 60 | 0.59 |
| *45-59* | 103 | 52 | **0.51** | 57 | **0.55** | 97 | 0.94 | 57 | **0.55** |
| *60-74* | 81 | 42 | **0.52** | 45 | **0.56** | 46 | 0.57 | 50 | **0.61** |
| *75+* | 61 | 23 | 0.37 | 26 | **0.42** | 0 | - | 30 | **0.50** |
| ***Total*** | 89 | 42 | **0.47** | 48 | **0.55** | 64 | **0.71** | 51 | **0.57** |
| ***FPG Tests*** |  |  |  |  |  |  |  |  |  |
| ***Sex*** |  |  |  |  |  |  |  |  |  |
| *Men* | 120 | 61 | **0.51** | 57 | **0.47** | 61 | **0.50** | 60 | **0.50** |
| *Women* | 111 | 38 | **0.35** | 51 | **0.46** | 72 | **0.65** | 50 | **0.45** |
| ***Age group*** | |  |  |  |  |  |  |  |  |
| *30-44* | 133 | 22 | **0.17** | 79 | **0.59** | 70 | 0.53 | 74 | **0.55** |
| *45-59* | 129 | 52 | **0.40** | 62 | **0.48** | 94 | 0.73 | 63 | **0.49** |
| *60-74* | 105 | 55 | **0.52** | 45 | **0.43** | 54 | **0.51** | 46 | **0.43** |
| *75+* | 82 | 30 | **0.37** | 32 | **0.39** | 12 | **0.14** | 40 | **0.49** |
| ***Total*** | 114 | 47 | **0.42** | 53 | **0.47** | 67 | **0.58** | 54 | **0.48** |

Supplementary Table 2: Comparison of FPG and HbA1c Test Rates Across COVID Phases Relative to Pre-COVID Levels, Stratified by Sex and Age Group

|  | ***First cases*** | | |  | ***First wave*** | | |  | ***Intermittent period*** | | |  | ***Second wave*** | | |
| --- | --- | --- | --- | --- | --- | --- | --- | --- | --- | --- | --- | --- | --- | --- | --- |
| ***HbA1c*** | ***Rate ratio*** | ***CI interval*** | ***p-value*** |  | ***Rate ratio*** | ***CI interval*** | ***p-value*** |  | ***Rate ratio*** | ***CI interval*** | ***p-value*** |  | ***Rate ratio*** | ***CI interval*** | ***p-value*** |
| ***Sex*** |  |  |  |  |  |  |  |  |  |  |  |  |  |  |  |
| *Men* | **0.60** | **(0.4-0.89)** | **0.01** |  | **0.56** | **(0.45-0.7)** | **0.00** |  | **0.50** | **(0.29-0.85)** | **0.01** |  | **0.62** | **(0.47-0.8)** | **0.00** |
| *Women* | **0.37** | **(0.24-0.58)** | **0.00** |  | **0.53** | **(0.44-0.65)** | **0.00** |  | 0.89 | (0.62-1.28) | 0.53 |  | **0.53** | **(0.41-0.69)** | **0.00** |
| ***Age group*** | |  |  |  |  |  |  |  |  |  |  |  |  |  |  |
| *30-44* | **0.22** | **(0.05-0.89)** | **0.03** |  | **0.59** | **(0.37-0.93)** | **0.02** |  | 0.69 | (0.25-1.89) | 0.47 |  | 0.59 | (0.32-1.07) | 0.08 |
| *45-59* | **0.51** | **(0.33-0.76)** | **0.00** |  | **0.55** | **(0.45-0.68)** | **0.00** |  | 0.94 | (0.64-1.38) | 0.76 |  | **0.55** | **(0.42-0.72)** | **0.00** |
| *60-74* | **0.52** | **(0.32-0.85)** | **0.01** |  | **0.56** | **(0.43-0.71)** | **0.00** |  | 0.57 | (0.32-1.02) | 0.06 |  | **0.61** | **(0.45-0.83)** | **0.00** |
| *75+* | 0.37 | (0.12-1.19) | 0.09 |  | **0.42** | **(0.24-0.74)** | **0.00** |  | - | - | - |  | **0.50** | **(0.26-0.98)** | **0.04** |
| ***Total*** | **0.47** | **(0.35-0.64)** | **0.00** |  | **0.55** | **(0.47-0.63)** | **0.00** |  | **0.71** | **(0.53-0.97)** | **0.03** |  | **0.57** | **(0.47-0.68)** | **0.00** |
| ***FPG*** |  |  |  |  |  |  |  |  |  |  |  |  |  |  |  |
| ***Sex*** |  |  |  |  |  |  |  |  |  |  |  |  |  |  |  |
| *Men* | **0.51** | **(0.35-0.74)** | **0.00** |  | **0.47** | **(0.39-0.58)** | **0.00** |  | **0.50** | **(0.31-0.81)** | **0.00** |  | **0.50** | **(0.39-0.65)** | **0.00** |
| *Women* | **0.35** | **(0.23-0.52)** | **0.00** |  | **0.46** | **(0.38-0.55)** | **0.00** |  | **0.65** | **(0.45-0.94)** | **0.02** |  | **0.45** | **(0.36-0.58)** | **0.00** |
| ***Age group*** | |  |  |  |  |  |  |  |  |  |  |  |  |  |  |
| *30-44* | **0.17** | **(0.04-0.68)** | **0.01** |  | **0.59** | **(0.4-0.89)** | **0.01** |  | 0.53 | (0.19-1.43) | 0.21 |  | **0.55** | **(0.32-0.95)** | **0.03** |
| *45-59* | **0.40** | **(0.27-0.61)** | **0.00** |  | **0.48** | **(0.39-0.58)** | **0.00** |  | 0.73 | (0.5-1.07) | 0.10 |  | **0.49** | **(0.38-0.63)** | **0.00** |
| *60-74* | **0.52** | **(0.34-0.8)** | **0.00** |  | **0.43** | **(0.34-0.55)** | **0.00** |  | **0.51** | **(0.3-0.87)** | **0.01** |  | **0.43** | **(0.32-0.59)** | **0.00** |
| *75+* | **0.37** | **(0.13-1.01)** | **0.05** |  | **0.39** | **(0.24-0.64)** | **0.00** |  | **0.14** | **(0.02-1.02)** | **0.05** |  | **0.49** | **(0.27-0.87)** | **0.02** |
| ***Total*** | **0.42** | **(0.32-0.55)** | **0.00** |  | **0.47** | **(0.41-0.53)** | **0.00** |  | **0.58** | **(0.44-0.78)** | **0.00** |  | **0.48** | **(0.4-0.57)** | **0.00** |

Supplementary Table 3: Comparison of OPD rates per 1000 person months with Pre-COVID Levels

|  | ***First cases*** | | |  | ***First wave*** | | |  | ***Intermittent period*** | | |  | | ***Second wave*** | | | |
| --- | --- | --- | --- | --- | --- | --- | --- | --- | --- | --- | --- | --- | --- | --- | --- | --- | --- |
| ***OPD*** | ***Rate ratio*** | ***CI interval*** | ***p-value*** | | ***Rate ratio*** | ***CI interval*** | ***p-value*** | | ***Rate ratio*** | ***CI interval*** | ***p-value*** | | ***Rate ratio*** | | ***CI interval*** | ***p-value*** |
| ***Sex*** | | | | | | | | | | | | | | | | | |
| *Men* | **0.61** | **(0.56-0.68)** | **0.00** |  | **0.58** | **(0.55-0.61)** | **0.00** |  | **0.79** | **(0.71-0.88)** | **0.00** |  | **0.58** | | **(0.54-0.62)** | **0.00** |
| *Women* | **0.47** | **(0.43-0.52)** | **0.00** |  | **0.51** | **(0.49-0.53)** | **0.00** |  | **0.82** | **(0.75-0.89)** | **0.00** |  | **0.48** | | **(0.45-0.51)** | **0.00** |
| ***Age group*** | | | | | | | | | | | | | | | | | |
| *30-44* | **0.46** | **(0.37-0.59)** | **0.00** |  | **0.46** | **(0.41-0.52)** | **0.00** |  | 0.91 | (0.73-1.12) | 0.38 |  | **0.55** | | **(0.48-0.64)** | **0.00** |
| *45-59* | **0.53** | **(0.48-0.59)** | **0.00** |  | **0.54** | **(0.51-0.57)** | **0.00** |  | **0.80** | **(0.72-0.89)** | **0.00** |  | **0.55** | | **(0.51-0.59)** | **0.00** |
| *60-74* | **0.53** | **(0.47-0.59)** | **0.00** |  | **0.56** | **(0.52-0.59)** | **0.00** |  | **0.83** | **(0.74-0.93)** | **0.00** |  | **0.49** | | **(0.45-0.53)** | **0.00** |
| *75+* | **0.60** | **(0.49-0.72)** | **0.00** |  | **0.54** | **(0.49-0.6)** | **0.00** |  | **0.68** | **(0.54-0.84)** | **0.00** |  | **0.49** | | **(0.43-0.57)** | **0.00** |
| ***Thyroid*** | | | | | | | | | | | | | | | | | |
| *No* | **0.55** | **(0.5-0.59)** | **0.00** |  | **0.54** | **(0.52-0.56)** | **0.00** |  | **0.81** | **(0.75-0.88)** | **0.00** |  | **0.54** | | **(0.51-0.57)** | **0.00** |
| *Yes* | **0.50** | **(0.43-0.56)** | **0.00** |  | **0.53** | **(0.5-0.57)** | **0.00** |  | **0.78** | **(0.69-0.89)** | **0.00** |  | **0.48** | | **(0.44-0.53)** | **0.00** |
| ***Dyslipidemia*** | | | | | | | | | | | | | | | | | |
| *No* | **0.54** | **(0.36-0.8)** | **0.00** |  | **0.52** | **(0.42-0.64)** | **0.00** |  | 0.68 | (0.44-1.04) | 0.08 |  | **0.48** | | **(0.36-0.63)** | **0.00** |
| *Yes* | **0.53** | **(0.5-0.57)** | **0.00** |  | **0.54** | **(0.52-0.56)** | **0.00** |  | **0.81** | **(0.76-0.87)** | **0.00** |  | **0.52** | | **(0.5-0.55)** | **0.00** |
| ***Hypertension*** | | | | | | | | | | | | | | | | | |
| *No* | **0.48** | **(0.38-0.62)** | **0.00** |  | **0.56** | **(0.5-0.63)** | **0.00** |  | **0.65** | **(0.5-0.85)** | **0.00** |  | **0.53** | | **(0.45-0.62)** | **0.00** |
| *Yes* | **0.54** | **(0.5-0.57)** | **0.00** |  | **0.54** | **(0.52-0.56)** | **0.00** |  | **0.82** | **(0.76-0.88)** | **0.00** |  | **0.52** | | **(0.5-0.55)** | **0.00** |
| ***Pre-COVID healthcare usage*** | | | | | | | | | | | | | | | | | |
| *Low* | **0.55** | **(0.46-0.66)** | **0.00** |  | **0.62** | **(0.57-0.67)** | **0.00** |  | 0.93 | (0.79-1.1) | 0.39 |  | **0.61** | | **(0.55-0.69)** | **0.00** |
| *Medium* | **0.60** | **(0.54-0.68)** | **0.00** |  | **0.55** | **(0.51-0.58)** | **0.00** |  | **0.76** | **(0.67-0.86)** | **0.00** |  | **0.54** | | **(0.49-0.58)** | **0.00** |
| *High* | **0.47** | **(0.43-0.52)** | **0.00** |  | **0.50** | **(0.48-0.52)** | **0.00** |  | **0.78** | **(0.71-0.86)** | **0.00** |  | **0.48** | | **(0.45-0.51)** | **0.00** |
| ***Total*** | **0.53** | **(0.5-0.57)** | **0.00** |  | **0.54** | **(0.52-0.56)** | **0.00** |  | **0.81** | **(0.75-0.86)** | **0.00** |  | **0.52** | | **(0.5-0.55)** | **0.00** |

Supplementary Table 4: Comparison of Pharmacy visits rates per 1000 person months with Pre-COVID Levels

|  | ***First cases*** | | | |  | ***First wave*** | | |  | ***Intermittent period*** | | |  | ***Second wave*** | | |
| --- | --- | --- | --- | --- | --- | --- | --- | --- | --- | --- | --- | --- | --- | --- | --- | --- |
| ***Drug*** | ***Rate ratio*** | | ***CI interval*** | ***p-value*** |  | ***Rate ratio*** | ***CI interval*** | ***p-value*** |  | ***Rate ratio*** | ***CI interval*** | ***p-value*** |  | ***Rate ratio*** | ***CI interval*** | ***p-value*** |
| **Sex** |  | |  |  |  |  |  |  |  |  |  |  |  |  |  |  |
| Men | **0.62** | | **(0.55-0.7)** | **0.00** |  | **0.64** | **(0.6-0.67)** | **0.00** |  | **0.86** | **(0.76-0.96)** | **0.01** |  | **0.55** | **(0.5-0.59)** | **0.00** |
| Women | **0.56** | | **(0.5-0.61)** | **0.00** |  | **0.59** | **(0.56-0.62)** | **0.00** |  | **0.87** | **(0.79-0.97)** | **0.01** |  | **0.50** | **(0.46-0.53)** | **0.00** |
| **Age group** | |  |  |  |  |  |  |  |  |  |  |  |  |  |  |  |
| 30-44 | **0.62** | | **(0.48-0.79)** | **0.00** |  | **0.59** | **(0.52-0.68)** | **0.00** |  | 0.83 | (0.63-1.08) | 0.17 |  | **0.50** | **(0.42-0.6)** | **0.00** |
| 45-59 | **0.63** | | **(0.57-0.71)** | **0.00** |  | **0.65** | **(0.62-0.69)** | **0.00** |  | 0.91 | (0.81-1.02) | 0.12 |  | **0.55** | **(0.51-0.6)** | **0.00** |
| 60-74 | **0.50** | | **(0.44-0.57)** | **0.00** |  | **0.59** | **(0.55-0.63)** | **0.00** |  | **0.84** | **(0.74-0.96)** | **0.01** |  | **0.50** | **(0.45-0.54)** | **0.00** |
| 75+ | **0.63** | | **(0.51-0.77)** | **0.00** |  | **0.54** | **(0.48-0.61)** | **0.00** |  | 0.81 | (0.65-1.01) | 0.06 |  | **0.47** | **(0.41-0.55)** | **0.00** |
| **Thyroid** |  | |  |  |  |  |  |  |  |  |  |  |  |  |  |  |
| No | **0.57** | | **(0.52-0.62)** | **0.00** |  | **0.60** | **(0.58-0.63)** | **0.00** |  | **0.88** | **(0.81-0.96)** | **0.01** |  | **0.52** | **(0.48-0.55)** | **0.00** |
| Yes | **0.61** | | **(0.53-0.7)** | **0.00** |  | **0.62** | **(0.58-0.67)** | **0.00** |  | **0.83** | **(0.72-0.96)** | **0.02** |  | **0.52** | **(0.47-0.57)** | **0.00** |
| **Dyslipidemia** | | |  |  |  |  |  |  |  |  |  |  |  |  |  |  |
| No | 0.85 | | (0.56-1.29) | 0.44 |  | **0.65** | **(0.51-0.84)** | **0.00** |  | 0.76 | (0.44-1.31) | 0.33 |  | **0.54** | **(0.39-0.77)** | **0.00** |
| Yes | **0.58** | | **(0.53-0.62)** | **0.00** |  | **0.61** | **(0.59-0.63)** | **0.00** |  | **0.87** | **(0.8-0.94)** | **0.00** |  | **0.52** | **(0.49-0.54)** | **0.00** |
| **Hypertension** | | |  |  |  |  |  |  |  |  |  |  |  |  |  |  |
| No | **0.71** | | **(0.54-0.93)** | **0.01** |  | **0.69** | **(0.6-0.8)** | **0.00** |  | **0.66** | **(0.47-0.93)** | **0.02** |  | **0.54** | **(0.44-0.66)** | **0.00** |
| Yes | **0.57** | | **(0.53-0.62)** | **0.00** |  | **0.60** | **(0.58-0.63)** | **0.00** |  | **0.88** | **(0.81-0.95)** | **0.00** |  | **0.51** | **(0.49-0.54)** | **0.00** |
| **Pre-COVID healthcare usage** | | | |  |  |  |  |  |  |  |  |  |  |  |  |  |
| Low | **0.58** | | **(0.48-0.71)** | **0.00** |  | **0.63** | **(0.57-0.69)** | **0.00** |  | 1.04 | (0.87-1.25) | 0.65 |  | **0.60** | **(0.53-0.68)** | **0.00** |
| Medium | **0.60** | | **(0.53-0.68)** | **0.00** |  | **0.60** | **(0.56-0.64)** | **0.00** |  | **0.80** | **(0.7-0.92)** | **0.00** |  | **0.51** | **(0.46-0.56)** | **0.00** |
| High | **0.56** | | **(0.5-0.62)** | **0.00** |  | **0.59** | **(0.56-0.63)** | **0.00** |  | **0.84** | **(0.75-0.93)** | **0.00** |  | **0.49** | **(0.45-0.53)** | **0.00** |
| **Total** | **0.58** | | **(0.54-0.63)** | **0.00** |  | **0.61** | **(0.59-0.63)** | **0.00** |  | **0.87** | **(0.8-0.94)** | **0.00** |  | **0.52** | **(0.49-0.54)** | **0.00** |

Supplementary Table 5: Comparison of IPD rates per 1000 person months with Pre-COVID Levels

|  | ***First cases*** | | | |  | ***First wave*** | | |  | ***Intermittent period*** | | |  | ***Second wave*** | | |
| --- | --- | --- | --- | --- | --- | --- | --- | --- | --- | --- | --- | --- | --- | --- | --- | --- |
| ***IPD*** | ***Rate ratio*** | ***CI interval*** | ***p-value*** | |  | ***Rate ratio*** | ***CI interval*** | ***p-value*** |  | ***Rate ratio*** | ***CI interval*** | ***p-value*** |  | ***Rate ratio*** | ***CI interval*** | ***p-value*** |
| ***Sex*** |  |  | |  |  |  |  |  |  |  |  |  |  |  |  |  |
| *Men* | **0.26** | **(0.08-0.81)** | | **0.02** |  | **0.62** | **(0.42-0.93)** | **0.02** |  | **0.26** | **(0.06-1.07)** | **0.06** |  | 0.73 | (0.45-1.18) | 0.19 |
| *Women* | **0.31** | **(0.12-0.86)** | | **0.02** |  | **0.49** | **(0.32-0.74)** | **0.00** |  | 1.47 | (0.8-2.68) | 0.21 |  | **0.52** | **(0.3-0.88)** | **0.01** |
| ***Age group*** |  |  | |  |  |  |  |  |  |  |  |  |  |  |  |  |
| *30-44* | - | - | | - |  | 0.38 | (0.08-1.8) | 0.22 |  | - | - | - |  | 0.37 | (0.05-2.94) | 0.35 |
| *45-59* | - | - | | - |  | **0.32** | **(0.19-0.56)** | **0.00** |  | 0.62 | (0.23-1.7) | 0.35 |  | **0.45** | **(0.24-0.85)** | **0.01** |
| *60-74* | 0.41 | (0.15-1.11) | | 0.08 |  | 0.74 | (0.49-1.12) | 0.15 |  | 1.42 | (0.71-2.84) | 0.32 |  | 0.83 | (0.5-1.36) | 0.46 |
| *75+* | 0.86 | (0.26-2.85) | | 0.81 |  | 0.74 | (0.37-1.47) | 0.39 |  | 0.44 | (0.06-3.27) | 0.42 |  | 0.58 | (0.22-1.52) | 0.27 |
| ***Thyroid*** |  |  | |  |  |  |  |  |  |  |  |  |  |  |  |  |
| *No* | **0.22** | **(0.08-0.58)** | | **0.00** |  | **0.57** | **(0.41-0.79)** | **0.00** |  | 0.75 | (0.38-1.47) | 0.41 |  | **0.59** | **(0.39-0.9)** | **0.01** |
| *Yes* | 0.51 | (0.16-1.64) | | 0.26 |  | **0.51** | **(0.28-0.93)** | **0.03** |  | 1.33 | (0.52-3.35) | 0.55 |  | 0.70 | (0.35-1.39) | 0.31 |
| ***Dyslipidemia*** |  |  | |  |  |  |  |  |  |  |  |  |  |  |  |  |
| *No* | 2.40 | (0.25-23.09) | | 0.45 |  | 0.51 | (0.05-4.95) | 0.56 |  | - | - | - |  | 1.95 | (0.33-11.67) | 0.46 |
| *Yes* | **0.25** | **(0.11-0.56)** | | **0.00** |  | **0.55** | **(0.41-0.74)** | **0.00** |  | 0.90 | (0.52-1.56) | 0.72 |  | **0.60** | **(0.41-0.86)** | **0.01** |
| ***Hypertension*** |  |  | |  |  |  |  |  |  |  |  |  |  |  |  |  |
| *No* | - | - | | - |  | - | - | - |  | - | - | - |  | 0.97 | (0.2-4.82) | 0.97 |
| *Yes* | **0.30** | **(0.14-0.63)** | | **0.00** |  | **0.57** | **(0.43-0.77)** | **0.00** |  | 0.92 | (0.53-1.59) | 0.76 |  | **0.61** | **(0.42-0.87)** | **0.01** |
| ***Pre-COVID healthcare usage*** |  |  | |  |  |  |  |  |  |  |  |  |  |  |  |  |
| *Low* | 1.13 | (0.66-1.93) | | 0.65 |  | 1.06 | (0.33-3.46) | 0.92 |  |  |  |  |  | 0.56 | (0.23-1.33) | 0.19 |
| *Medium* | 0.59 | (0.21-1.63) | | 0.31 |  | **0.44** | **(0.24-0.8)** | **0.01** |  | 0.23 | (0.03-1.64) | 0.14 |  | **0.42** | **(0.19-0.92)** | **0.03** |
| *High* | **0.22** | **(0.07-0.7)** | | **0.01** |  | **0.41** | **(0.27-0.64)** | **0.00** |  | 1.15 | (0.6-2.21) | 0.67 |  | 0.73 | (0.47-1.15) | 0.18 |
| ***Total*** | **0.29** | **(0.13-0.61)** | | **0.00** |  | **0.55** | **(0.41-0.74)** | **0.00** |  | 0.89 | (0.52-1.53) | 0.67 |  | **0.62** | **(0.43-0.88)** | **0.01** |

Supplementary Table 6: Comparison of Lab test rates per 1000 person months with Pre-COVID Levels

|  | ***First cases*** | | |  | ***First wave*** | | | |  | | ***Intermittent period*** | | | | |  | | ***Second wave*** | | |
| --- | --- | --- | --- | --- | --- | --- | --- | --- | --- | --- | --- | --- | --- | --- | --- | --- | --- | --- | --- | --- |
| ***Lab*** | ***Rate ratio*** | ***CI interval*** | ***p-value*** |  | ***Rate ratio*** | ***CI interval*** | ***p-value*** |  | | ***Rate ratio*** | | ***CI interval*** | ***p-value*** |  | ***Rate ratio*** | | ***CI interval*** | | ***p-value*** |
| ***Sex*** |  |  |  |  |  |  |  |  | |  | |  |  |  |  | |  | |  |
| *Men* | 0.50 | (0.38-0.67) | 0.00 |  | 0.51 | (0.44-0.59) | 0.00 |  | | 0.50 | | (0.35-0.71) | 0.00 |  | 0.48 | | (0.4-0.58) | | 0.00 |
| *Women* | 0.27 | (0.19-0.38) | 0.00 |  | 0.50 | (0.44-0.57) | 0.00 |  | | 0.84 | | (0.66-1.08) | 0.17 |  | 0.39 | | (0.33-0.48) | | 0.00 |
| *Age group* | |  |  |  |  |  |  |  | |  | |  |  |  |  | |  | |  |
| *30-44* | 0.15 | (0.05-0.47) | 0.00 |  | 0.47 | (0.33-0.66) | 0.00 |  | | 0.32 | | (0.12-0.86) | 0.02 |  | 0.46 | | (0.29-0.72) | | 0.00 |
| *45-59* | 0.35 | (0.25-0.49) | 0.00 |  | 0.48 | (0.41-0.55) | 0.00 |  | | 0.75 | | (0.56-0.99) | 0.04 |  | 0.44 | | (0.36-0.54) | | 0.00 |
| *60-74* | 0.46 | (0.32-0.64) | 0.00 |  | 0.56 | (0.48-0.66) | 0.00 |  | | 0.83 | | (0.6-1.14) | 0.24 |  | 0.44 | | (0.35-0.55) | | 0.00 |
| *75+* | 0.38 | (0.2-0.71) | 0.00 |  | 0.44 | (0.33-0.6) | 0.00 |  | | 0.35 | | (0.15-0.78) | 0.01 |  | 0.35 | | (0.23-0.54) | | 0.00 |
| ***Thyroid*** |  |  |  |  |  |  |  |  | |  | |  |  |  |  | |  | |  |
| *No* | 0.43 | (0.34-0.55) | 0.00 |  | 0.49 | (0.44-0.55) | 0.00 |  | | 0.65 | | (0.51-0.83) | 0.00 |  | 0.43 | | (0.37-0.51) | | 0.00 |
| *Yes* | 0.22 | (0.13-0.37) | 0.00 |  | 0.53 | (0.44-0.63) | 0.00 |  | | 0.78 | | (0.55-1.11) | 0.17 |  | 0.44 | | (0.34-0.56) | | 0.00 |
| *Dyslipidemia* | |  |  |  |  |  |  |  | |  | |  |  |  |  | |  | |  |
| *No* | 1.66 | (0.68-4.04) | 0.26 |  | 0.53 | (0.25-1.14) | 0.11 |  | | 1.71 | | (0.6-4.9) | 0.32 |  | 0.90 | | (0.41-1.99) | | 0.79 |
| *Yes* | 0.35 | (0.28-0.44) | 0.00 |  | 0.50 | (0.45-0.55) | 0.00 |  | | 0.67 | | (0.55-0.83) | 0.00 |  | 0.42 | | (0.37-0.49) | | 0.00 |
| *Hypertension* | |  |  |  |  |  |  |  | |  | |  |  |  |  | |  | |  |
| *No* | 0.32 | (0.14-0.73) | 0.01 |  | 0.56 | (0.4-0.77) | 0.00 |  | | 0.33 | | (0.12-0.9) | 0.03 |  | 0.39 | | (0.24-0.65) | | 0.00 |
| *Yes* | 0.37 | (0.3-0.47) | 0.00 |  | 0.50 | (0.45-0.55) | 0.00 |  | | 0.72 | | (0.59-0.89) | 0.00 |  | 0.44 | | (0.38-0.5) | | 0.00 |
| *Pre-COVID healthcare usage* | | |  |  |  |  |  |  | |  | |  |  |  |  | |  | |  |
| *Low* | 0.45 | (0.27-0.74) | 0.00 |  | 0.69 | (0.56-0.86) | 0.00 |  | | 0.91 | | (0.58-1.42) | 0.67 |  | 0.54 | | (0.39-0.73) | | 0.00 |
| *Medium* | 0.22 | (0.13-0.35) | 0.00 |  | 0.37 | (0.3-0.44) | 0.00 |  | | 0.43 | | (0.28-0.66) | 0.00 |  | 0.29 | | (0.22-0.38) | | 0.00 |
| *High* | 0.44 | (0.33-0.58) | 0.00 |  | 0.52 | (0.46-0.6) | 0.00 |  | | 0.78 | | (0.6-1.02) | 0.07 |  | 0.49 | | (0.41-0.59) | | 0.00 |
| ***Total*** | 0.37 | (0.3-0.46) | 0.00 |  | 0.50 | (0.46-0.55) | 0.00 |  | | 0.69 | | (0.56-0.84) | 0.00 |  | 0.43 | | (0.38-0.5) | | 0.00 |

Supplementary Figure 1: Correlation between Pre-COVID and COVID Wave 1 HbA1c Levels among Diabetes Patients

Supplementary Figure 2: Correlation between Pre-COVID and COVID Wave 2 HbA1c Levels among Diabetes Patients

Supplementary Table 7: Association between HbA1c Levels, OPD Visits, and Number of COVID Wave Days

| **OPD visits and HbA1c** | Spearman’s rho | p>|t| |
| --- | --- | --- |
| COVID Wave 1 | 0.0310 | 0.6698 |
| COVID Wave 2 | 0.0224 | 0.8030 |
| **HbA1c and Number of days of COVID wave, 90 days prior to the HbA1c test** | | |
| COVID Wave 1 | 0.00 | 0.9924 |
| COVID Wave 2 | 0.1550 | 0.0749 |

Supplementary Table 8: Average HbA1c and FPG of diabetes patients across the study periods

|  | ***pre COVID*** | | ***First cases*** | | ***COVID First wave*** | | ***Intermittent Period*** | | ***COVID second wave*** | |
| --- | --- | --- | --- | --- | --- | --- | --- | --- | --- | --- |
| ***Category*** | ***HbA1c*** | ***FPG*** | ***HbA1c*** | ***FPG*** | ***HbA1c*** | ***FPG*** | ***HbA1c*** | ***FPG*** | ***HbA1c*** | ***FPG*** |
| ***Total*** | *7.1 ± 0.0* | *127.5 ± 1.2* | *7.0 ± 0.2* | *126.5 ± 6.3* | *7.2 ± 0.1* | *131.8 ± 2.3* | *7.3 ± 0.3* | *126.8 ± 5.5* | *7.4 ± 0.1* | *136.3 ± 4.4* |
| ***Sex*** |  |  |  |  |  |  |  |  |  |  |
| *Men* | *7.2 ± 0.1* | *130.8 ± 1.7* | *6.8 ± 0.3* | *126.4 ± 9.1* | *7.2 ± 0.1* | *132.2 ± 3.0* | *7.0 ± 0.5* | *120.5 ± 6.7* | *7.3 ± 0.2* | *130.0 ± 5.9* |
| *Women* | *7.1 ± 0.1* | *124.8 ± 1.6* | *7.3 ± 0.3* | *126.7 ± 8.8* | *7.2 ± 0.1* | *131.6 ± 3.4* | *7.5 ± 0.3* | *130.8 ± 7.8* | *7.5 ± 0.2* | *141.9 ± 6.4* |
| ***Age Categories*** |  |  |  |  |  |  |  |  |  |  |
| *30-44* | *7.4 ± 0.2* | *138.1 ± 5.4* | *6.0 ± 0.4* | *97.5 ± 7.5* | *7.4 ± 0.4* | *148.0 ± 10.5* | *7.9 ± 0.2* | *153.0 ± 17.1* | *7.7 ± 0.4* | *156.2 ± 11.8* |
| *45-59* | *7.3 ± 0.1* | *131.9 ± 1.8* | *7.5 ± 0.3* | *140.2 ± 11.8* | *7.3 ± 0.1* | *133.4 ± 3.3* | *7.3 ± 0.3* | *125.0 ± 6.2* | *7.5 ± 0.2* | *138.5 ± 6.6* |
| *60-74* | *7.0 ± 0.1* | *121.3 ± 1.4* | *6.6 ± 0.3* | *118.8 ± 6.2* | *7.0 ± 0.1* | *124.7 ± 2.8* | *7.1 ± 0.6* | *125.8 ± 9.8* | *7.3 ± 0.2* | *133.5 ± 8.3* |
| *75+* | *6.7 ± 0.1* | *115.7 ± 2.4* | *6.2 ± 0.3* | *101.5 ± 9.0* | *7.0 ± 0.2* | *125.0 ± 5.5* | *7.2 ± 0.0* | *106.5 ± 19.5* | *6.7 ± 0.2* | *111.1 ± 4.8* |
